# Supplementary figures and images for: Molecular Phylogeny of Cimicoidea (Heteroptera: Cimicomorpha) Revisited: Increased Taxon Sampling Reveals Evolution of Traumatic Insemination and Paragenitalia
Source: MDPI journal article supplement (doi:10.3390/insects14030267), 2023-03-08

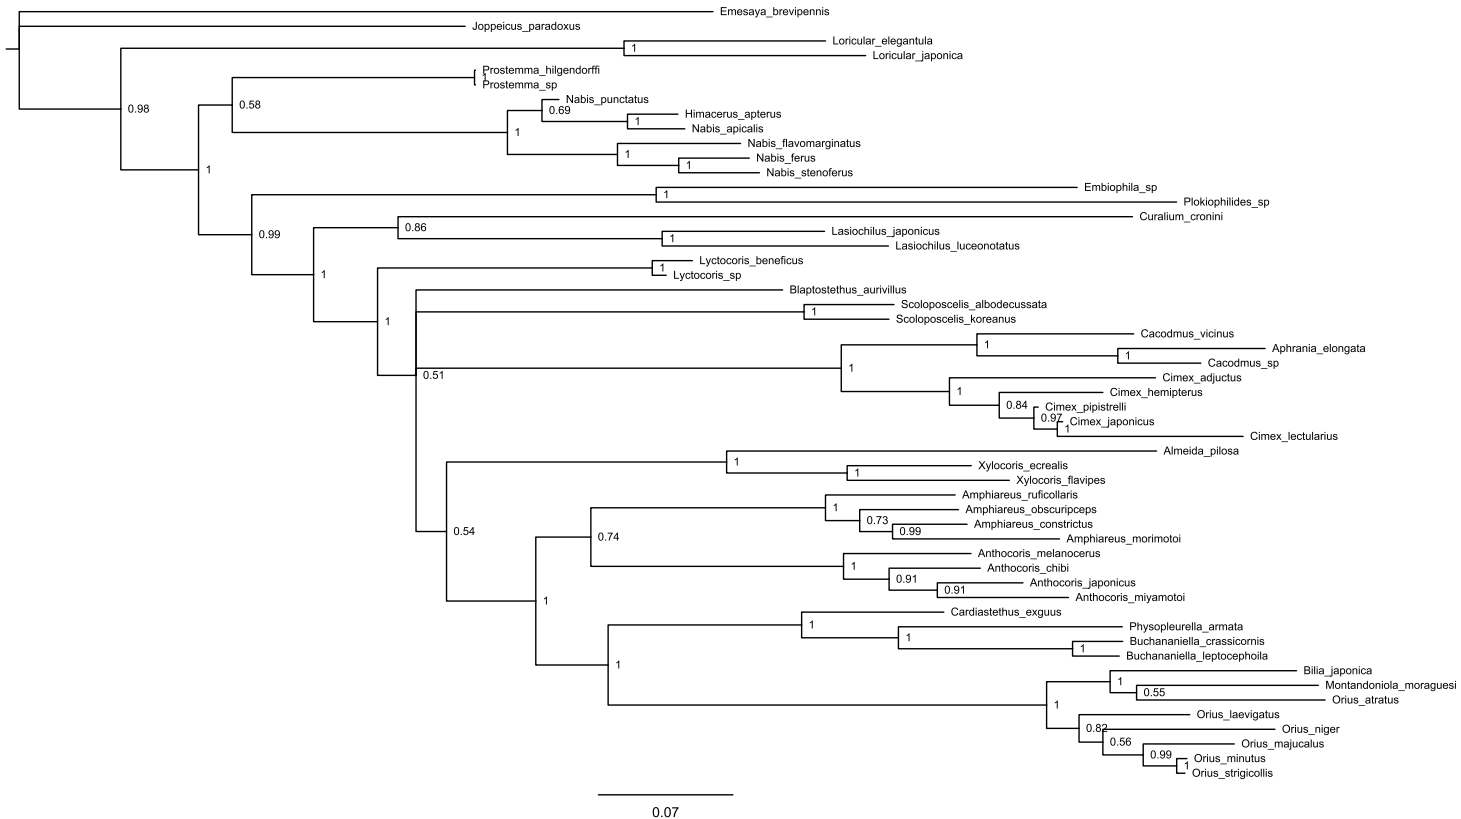

Supplement: s1 [file s1]
